# Supplementary material for: Sarcopenia in Neurological Patients: Standard Values for Temporal Muscle Thickness and Muscle Strength Evaluation
Source: PubMed Central journal article supplement (PMC7288067; doi:10.3390/jcm9051272), 2020-04-28
Supplement: jcm-09-01272-s001.pdf [file jcm-09-01272-s001.pdf]

**Supplementary Table 1: Clinical characteristics of the retrospective normal collective and the prospective patient cohort.**

|                              | Retrospective normal collective<br>(n = 624) | Prospective patient cohort<br>(n = 130) | p-value          |
|------------------------------|----------------------------------------------|-----------------------------------------|------------------|
| <b>Sex</b>                   |                                              |                                         |                  |
| Female (n, %)                | 384 (62%)                                    | 73 (56%)                                | 0.253            |
| Male (n, %)                  | 240 (38%)                                    | 57 (44%)                                |                  |
| <b>Age</b>                   | 43                                           | 47                                      | <b>0.004</b>     |
| (mean, SD, range; in years)  | (17.8; 18 - 85)                              | (17.7; 18 - 79)                         |                  |
| <b>TMT (mean, SD, in mm)</b> | 8.6 (1.8)                                    | 7.8 (1.7)                               | <b>&lt;0.001</b> |
| <b>Grip strength*</b>        | 31.02 (10.93)                                | 31.57 (12.05)                           | 0.624            |
| (mean, SD; in kg)            |                                              |                                         |                  |
| <b>BMI (mean, SD)</b>        | 27.6 (5.4)                                   | 25.8 (6.1)                              | <b>0.003</b>     |

\* of the dominant hand Abbreviations: BMI: body mass index; SD: standard deviation; TMT: temporal muscle thickness.

**Supplementary Table 2: Patient characteristics subdivided with regard to their disease entities.**

|                                            | Neuro-Oncological (n = 44) | Cerebro-Vascular<br>(n = 28) | CNS-Demyelinating<br>(n = 15) | Psychiatric<br>(n = 12) | Others<br>(n = 31)   |
|--------------------------------------------|----------------------------|------------------------------|-------------------------------|-------------------------|----------------------|
| <b>Sex</b>                                 |                            |                              |                               |                         |                      |
| Female                                     | 19(43%)                    | 10 (36%)                     | 5 (33%)                       | 4 (33%)                 | 19 (61%)             |
| Male                                       | 25(57%)                    | 18 (64%)                     | 10 (67%)                      | 8 (67%)                 | 12 (39%)             |
| <b>Age</b>                                 | 46                         | 55                           | 35                            | 38                      | 51                   |
| (mean, SD, range; in years)                | (18.2; 18-78)              | (17.3; 18-79)                | (10.4; 18-52)                 | (12.3; 20-65)           | (17.1; 18-78)        |
| <b>TMT (mean, SD; in mm)</b>               | 7.4 (1.9)                  | 7.6 (1.5)                    | 7.2 (1.4)                     | 8.4 (1.5)               | 8.2 (1.8)            |
| <b>Grip strength *</b>                     | 31.5 (12.6)                | 31.8 (9.4)                   | 34.8 (14.9)                   | 34.4 (11.7)             | 33.5 (11.7)          |
| (mean, SD; in kg)                          |                            |                              |                               |                         |                      |
| <b>BMI (mean, SD)</b>                      | 25.2 (5.3)                 | 26.8 (6.0)                   | 24 (4.6)                      | 24 (5.7)                | 27.3 (7.7)           |
| <b>Temporal wasting</b><br>(present; n, %) | 12 (27%)                   | 7 (25%)                      | 1 (7%)                        | 5 (42%)                 | 8 (26%)              |
| <b>Unintended weight loss</b><br>(n, %)    | 18 (41)                    | 6 (21)                       | 3 (20)                        | 6 (50)                  | 4 (13)               |
| <b>NANO scale (mean, range)</b>            | 2<br>(2.48; 0 - 9)         | 1.7<br>(1.12; 0 - 5)         | 2.7<br>(2.52; 0 - 10)         | 1.2<br>(1.80; 0 - 5)    | 1.1<br>(1.93; 0 - 9) |

\* dominant hand Abbreviations: CNS: central nervous system; BMI: body mass index; NANO: Neurological Assessment of Neuro-Oncology; SD: standard deviation; TMT: temporal muscle thickness.
